# Supplementary material
Source: ML conference proceedings conference paper supplement (https://openaccess.thecvf.com/content/CVPR2023/html/Yuan_Devil_Is_in_CVPR_2023_paper.html)
Supplement: Supplementary file 1 [file Yuan_Devil_Is_in_CVPR_2023_supplemental.pdf]

## A. Appendix

### A.1. Dataset Details

We provide the abbreviation and full name for each disease from *Pancreatic Tumors* and *Liver Tumors* in Tabs. A1 and A2, respectively. Meanwhile, we report their incidence count in our datasets.

We determine the data splitting of known (inliers) and unknown classes (outliers) according to the real-world medical scenario and previous clinical studies [2, 8]. For *Pancreatic Tumors*, we assign seven common pancreatic diseases (PDAC, PNET, SPT, IPMN, MCN, CP, and SCN) as inliers, and allocate two peri-pancreatic diseases (AC, DC) and “other” as outliers. The two peri-pancreatic diseases (AC, DC) are relatively difficult to distinguish from PDACs by radiologists, but clinical studies of pancreatic lesion diagnosis [2, 8] did not include them because they are not inside the pancreas. Thus we regard them as OOD in our model. For *Liver Tumors*, we assign five common liver tumors [10] (HCC, ICC, metastasis, hemangiomas, and cyst) as inliers, and allocate hepatoblastoma, FNH, and “other” as outliers, due to their low incidental rate.

Note that “other” class represents rare neoplasms or tumors in the real-world dataset, which reflects the long-tailed distribution of real-world disease incidence. Since these rare diseases are individually infrequent, it is impossible to collect them completely. Therefore, we address the thorny problem by OOD detection and localization.

| Abbr.   | Full name                                | Count |
|---------|------------------------------------------|-------|
| PDAC    | Pancreatic ductal adenocarcinoma         | 366   |
| IPMN    | Intraductal papillary mucinous neoplasms | 61    |
| PNET    | Pancreatic neuroendocrine tumor          | 35    |
| SCN     | Serous cystic neoplasms                  | 46    |
| CP      | Chronic pancreatitis                     | 43    |
| SPT     | Solid pseudopapillary tumor              | 32    |
| MCN     | Mucinous cystadenoma                     | 7     |
| AC      | Ampullary cancer                         | 46    |
| DC      | Bile duct cancer                         | 12    |
| “other” | Other rare neoplasms                     | 13    |

Table A1. Dataset details of real-world *Pancreatic Tumors*. This full-spectrum dataset consists of ten pancreatic diseases, among which we assign the top seven as inlier tumors and the bottom three as outlier tumors, based on the real-world medical scenario and previous clinical studies [2, 8].

### A.2. Qualitative Results on Liver Tumors

For qualitative analysis on *Liver Tumors*, we present visual examples of anomaly score map for OOD localization in Fig. A1. This shows that our approach achieves a high anomaly score in the OOD pixels (outlier tumor), while a low anomaly score in the in-distribution pixels (organ), compared with other methods.

| Abbr.   | Full name                       | Count |
|---------|---------------------------------|-------|
| HCC     | Hepatocellular carcinoma        | 162   |
| ICC     | Intrahepatic cholangiocarcinoma | 51    |
| Meta.   | Metastasis                      | 97    |
| Heman.  | Hemangiomas                     | 75    |
| Cyst    | Cyst                            | 146   |
| Hepato. | Hepatoblastoma                  | 17    |
| FNH     | Focal nodular hyperplasia       | 27    |
| “other” | Other rare tumors               | 60    |

Table A2. Dataset details of real-world *Liver Tumors*. This full-spectrum dataset includes seven liver tumors, among which we assign the top five as inlier tumors and the bottom three as outlier tumors, according to the real-world medical scenario and previous clinical studies [10].

### A.3. Baselines for Inlier Segmentation

**Comparison with Other Baselines.** For a fair comparison with our method, we train UNet [7], UNet++ [12], TransUNet [1] based on the framework of nnUNet [5]. TransUNet adopts transformer modules as pixel encoder, whereas our method uses CNN as the pixel-level backbone and leverages stand-alone transformer modules to interact with it. As presented in Tab. A3, our method shows superiority on inlier segmentation compared with strong baselines, including nnUNet [5] and (nn)TransUNet [1]. This demonstrates that the distinctive architecture of our newly designed mask transformers leads to better performance on real-world medical image segmentation.

We also train Swin UNETR [9] using their officially released code and pre-trained model. We find that Swin UNETR [9] could not converge to reasonable tumor segmentations on *Pancreatic Tumors*, that might be due to its difficulty in identifying subtle tumor differences without sufficient data samples. Meanwhile, Swin UNETR [9] achieves Dice scores of 50.48% (HCC), 32.62% (ICC), 36.06% (Meta.), 71.82% (Heman.) and 15.30% (Cyst) on *Liver Tumors*, resulting in the average score of 41.26%.

### A.4. Statistical Analysis

The Wilcoxon signed-rank test shows our method shows significant improvement to the second-best approaches on all metrics with  $p < 0.01$ , as presented in Tab. A4.

### A.5. Hyper-parameter Selection.

We discuss in detail the key hyper-parameter of our method, i.e.,  $(N_1, N_2, N_3)$ , for controlling the query distribution, in Tab. 3 and Sec. 4.4. Our method shows robustness to different settings of query distribution. And another important hyper-parameter is the number of queries. It should be redundantly larger than the possible/useful classes in the data, which depends heavily on the data and the task. For other hyper-parameters on data augmenta-

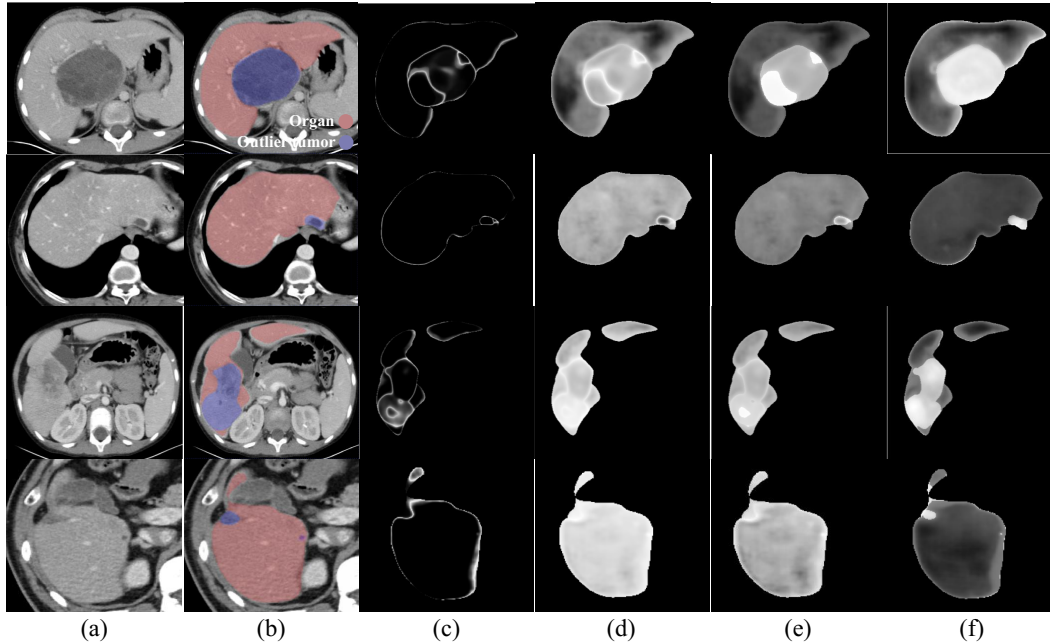

Figure A1. Visualization results of anomaly score map for OOD localization on *Liver Tumors*: (a) 2D slices of the CT image, (b) ground truth annotation (red: liver, blue: outlier tumor), (c) MSP [4], (d) MaxLogit [3], (e) SML [6] and (f) Ours. The grayscale level indicates the anomaly score. Our method reaches a high anomaly score in the OOD pixels (outlier tumor), while a low anomaly score in the in-distribution pixels (organ).

| Methods       | Pancreatic % |       |       |       |       |       |       |              | Liver % |       |       |        |       |              |
|---------------|--------------|-------|-------|-------|-------|-------|-------|--------------|---------|-------|-------|--------|-------|--------------|
|               | PDAC         | IPMN  | PNET  | SCN   | CP    | SPT   | MCN   | Avg.         | HCC     | ICC   | Meta. | Heman. | Cyst  | Avg.         |
| UNet [7]      | 63.96        | 21.07 | 21.72 | 30.70 | 17.88 | 33.96 | 18.10 | 29.62        | 61.59   | 28.76 | 43.77 | 65.01  | 37.39 | 47.30        |
| UNet++ [12]   | 63.43        | 22.85 | 14.52 | 25.09 | 15.02 | 21.36 | 10.07 | 24.62        | 56.51   | 29.13 | 36.88 | 56.74  | 46.60 | 45.17        |
| TransUNet [1] | 64.91        | 31.18 | 26.78 | 38.96 | 22.39 | 29.87 | 30.27 | 34.91        | 52.26   | 25.50 | 42.31 | 70.90  | 47.52 | 47.70        |
| nnUNet [5]    | 65.65        | 27.60 | 32.59 | 36.46 | 23.33 | 31.73 | 30.96 | 35.47        | 57.22   | 28.16 | 52.81 | 77.55  | 46.49 | 52.45        |
| <b>Ours</b>   | 67.91        | 46.92 | 32.07 | 42.51 | 31.36 | 42.67 | 28.97 | <b>41.77</b> | 67.61   | 30.78 | 60.40 | 77.07  | 47.61 | <b>56.69</b> |

Table A3. Inlier segmentation Dice scores (%) on *val* set of *Pancreatic Tumors* and *Liver Tumors* (all methods report results with final checkpoint). Our method notably outperforms all baselines for the task of inlier tumor segmentation.

| $p$      | AUROC                | AUPR                 | FPR95                | DSC                  |
|----------|----------------------|----------------------|----------------------|----------------------|
| Pancreas | $4.4 \times 10^{-6}$ | $2.0 \times 10^{-6}$ | $2.7 \times 10^{-7}$ | $2.0 \times 10^{-6}$ |
| Liver    | $2.3 \times 10^{-3}$ | $7.0 \times 10^{-3}$ | $6.7 \times 10^{-3}$ | $2.8 \times 10^{-3}$ |

Table A4. Results of Wilcoxon signed-rank test versus the second-best approaches on all metrics.

tion, pre-processing, network architecture, and optimization, we follow the original settings in nnUNet [5] and KMax-Deeplab [11].

## References

- [1] Jieneng Chen, Yongyi Lu, Qihang Yu, Xiangde Luo, Ehsan Adeli, Yan Wang, Le Lu, Alan L Yuille, and Yuyin Zhou. Transunet: Transformers make strong encoders for medical image segmentation. *arXiv preprint arXiv:2102.04306*, 2021. 1, 2
- [2] Linda C Chu, Seyoun Park, Sahar Soleimani, Daniel F Fouladi, Shahab Shayesteh, Jin He, Ammar A Javed, Christopher L Wolfgang, Bert Vogelstein, Kenneth W Kinzler, et al. Classification of pancreatic cystic neoplasms using radiomic feature analysis is equivalent to an experienced academic radiologist: a step toward computer-augmented diagnostics for radiologists. *Abdominal Radiology*, pages 1–12, 2022. 1
- [3] Dan Hendrycks, Steven Basart, Mantas Mazeika, Mohammadreza Mostajabi, Jacob Steinhardt, and Dawn Song. Scaling out-of-distribution detection for real-world settings. *ICML*, 2022. 2
- [4] Dan Hendrycks and Kevin Gimpel. A baseline for detecting misclassified and out-of-distribution examples in neural networks. *International Conference on Learning Representations, ICLR*, 2017. 2
- [5] Fabian Isensee, Paul F Jaeger, Simon AA Kohl, Jens Petersen, and Klaus H Maier-Hein. nnu-net: a self-configuring method for deep learning-based biomedical image segmentation. *Nature methods*, 18(2):203–211, 2021. 1, 2

- [6] Sanghun Jung, Jungsoo Lee, Daehoon Gwak, Sungha Choi, and Jaegul Choo. Standardized max logits: A simple yet effective approach for identifying unexpected road obstacles in urban-scene segmentation. In *Proceedings of the IEEE/CVF International Conference on Computer Vision*, pages 15425–15434, 2021. [2](#)
- [7] Olaf Ronneberger, Philipp Fischer, and Thomas Brox. U-net: Convolutional networks for biomedical image segmentation. In *International Conference on Medical image computing and computer-assisted intervention*, pages 234–241. Springer, 2015. [1](#), [2](#)
- [8] Simeon Springer, David L Masica, Marco Dal Molin, Christopher Douville, Christopher J Thoburn, Bahman Afsari, Lu Li, Joshua D Cohen, Elizabeth Thompson, Peter J Allen, et al. A multimodality test to guide the management of patients with a pancreatic cyst. *Science Translational Medicine*, 11(501):eaav4772, 2019. [1](#)
- [9] Yucheng Tang, Dong Yang, Wenqi Li, Holger R Roth, Bennett Landman, Daguang Xu, Vishwesh Nath, and Ali Hatamizadeh. Self-supervised pre-training of swin transformers for 3d medical image analysis. In *Proceedings of the IEEE/CVF Conference on Computer Vision and Pattern Recognition*, pages 20730–20740, 2022. [1](#)
- [10] Koichiro Yasaka, Hiroyuki Akai, Osamu Abe, and Shigeru Kiryu. Deep learning with convolutional neural network for differentiation of liver masses at dynamic contrast-enhanced CT: a preliminary study. *Radiology*, 286(3):887–896, 2018. [1](#)
- [11] Qihang Yu, Huiyu Wang, Siyuan Qiao, Maxwell Collins, Yukun Zhu, Hartwig Adam, Alan Yuille, and Liang-Chieh Chen. k-means mask transformer. In *European Conference on Computer Vision*, pages 288–307. Springer, 2022. [2](#)
- [12] Zongwei Zhou, Md Mahfuzur Rahman Siddiquee, Nima Tajbakhsh, and Jianming Liang. Unet++: Redesigning skip connections to exploit multiscale features in image segmentation. *IEEE Transactions on Medical Imaging*, 39(6):1856–1867, 2019. [1](#), [2](#)
